# Supplementary material for: Distinguishing Algal Blooms from Aquatic Vegetation in Chinese Lakes Using Sentinel 2 Image
Source: MDPI journal article supplement (doi:10.3390/rs14091988), 2022-04-21
Supplement: s1 [file s1]

Archive with 1 entries (1 files):
- remotesensing-1651324-supplementary.pdf
